# Supplementary material
Source: Springer Nature journal article supplement (https://www.springermedizin.de/resource/supplementary/12969_2014_1729_MOESM1_ESM.pdf/9590658)

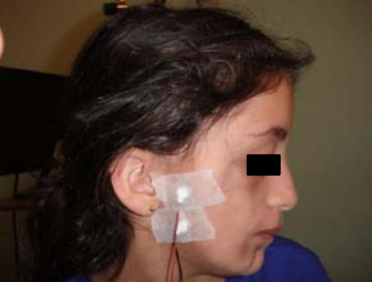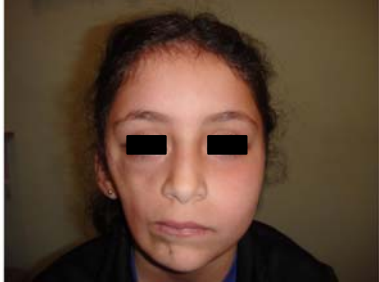

Supplement: MOESM1 [file 9590658]
